# Supplementary material for: A dual response UV-vis and fluorescence receptor based on acetylenic-indole conjoined silatrane for selective recognition of Co2+ and Cu2+ ions and in silico antidiabetic activity
Source: Royal Society of Chemistry journal article supplement (doi:10.1039/d3nj03436d), 2023-01-01
Supplement: d3nj03436d1.pdf [file d3nj03436d1.pdf]

**A dual response UV-vis and fluorescence receptor based on  
acetylenic-indole conjoined silatrane for selective recognition of  
Co<sup>2+</sup> and Cu<sup>2+</sup> ions, and *in silico* antidiabetic activity**

Gurjaspreet Singh<sup>a\*</sup>, Sushma<sup>b\*</sup>, Priyanka<sup>a</sup>, Anita Devi<sup>a</sup>, Tamana<sup>a</sup>, Harshbir Kaur<sup>a</sup>, Mithun<sup>a</sup>,  
Jandeep Singh<sup>c</sup>, Gurleen Singh<sup>c</sup>

<sup>a</sup>Department of Chemistry, Panjab University, Chandigarh-160014, India

<sup>b</sup>Chitkara College of Pharmacy, Chitkara University, Punjab-140401, India

<sup>c</sup>School of Chemical Engineering and Physical Sciences, Lovely Professional University,  
Phagwara-144411, Punjab, India

\*Corresponding Authors

1. Prof. Gurjaspreet Singh

Department of Chemistry and Centre of Advanced Studies

Panjab University, Chandigarh, India-160014

Email: [gjpsingh@pu.ac.in](mailto:gjpsingh@pu.ac.in)

2. Dr. Sushma

Assistant Professor

Chitkara College of Pharmacy

Chitkara University, Punjab-140401, India

Email: [sushma.dhanda21@gmail.com](mailto:sushma.dhanda21@gmail.com)

| <b>Entry</b>                                                                                          | <b>Page No.</b> |
|-------------------------------------------------------------------------------------------------------|-----------------|
| IR spectra of compound <b>4</b> (Fig. S1)                                                             | 3               |
| IR spectra of compound <b>5</b> (Fig. S2)                                                             | 3               |
| IR spectra of compound <b>6</b> (Fig. S3)                                                             | 4               |
| <sup>1</sup> H NMR spectra of compound <b>4</b> (Fig. S4)                                             | 4               |
| <sup>1</sup> H NMR spectra of compound <b>5</b> (Fig. S5)                                             | 5               |
| <sup>1</sup> H NMR spectra of compound <b>6</b> (Fig. S6)                                             | 5               |
| <sup>13</sup> C NMR spectra of compound <b>4</b> (Fig. S7)                                            | 6               |
| <sup>13</sup> C NMR spectra of compound <b>5</b> (Fig. S8)                                            | 6               |
| <sup>13</sup> C NMR spectra of compound <b>6</b> (Fig. S9)                                            | 7               |
| HRMS of compound <b>4</b> (Fig. S10)                                                                  | 7               |
| Mass Spectra of compound <b>5</b> (Fig. S11)                                                          | 8               |
| Mass fragmentation pattern for synthesized silatrane <b>6</b> (Scheme S1)                             | 8               |
| HRMS of compound <b>6</b> (Fig. S12)                                                                  | 9               |
| <sup>1</sup> H NMR spectra of <b>5</b> -Co <sup>2+</sup> complex (Fig. S13)                           | 10              |
| <sup>1</sup> H NMR spectra of <b>5</b> -Cu <sup>2+</sup> complex (Fig. S14)                           | 10              |
| Time dependant UV-vis profile of ligand <b>5</b> in acetonitrile solution. (Fig. S15)                 | 11              |
| Picture of ligand <b>5</b> in the presence of different metal ions under the UV-vis light. (Fig. S16) | 11              |
| Thermogravemetric curves of compounds ( <b>4-6</b> ). (Fig. S17)                                      | 12              |

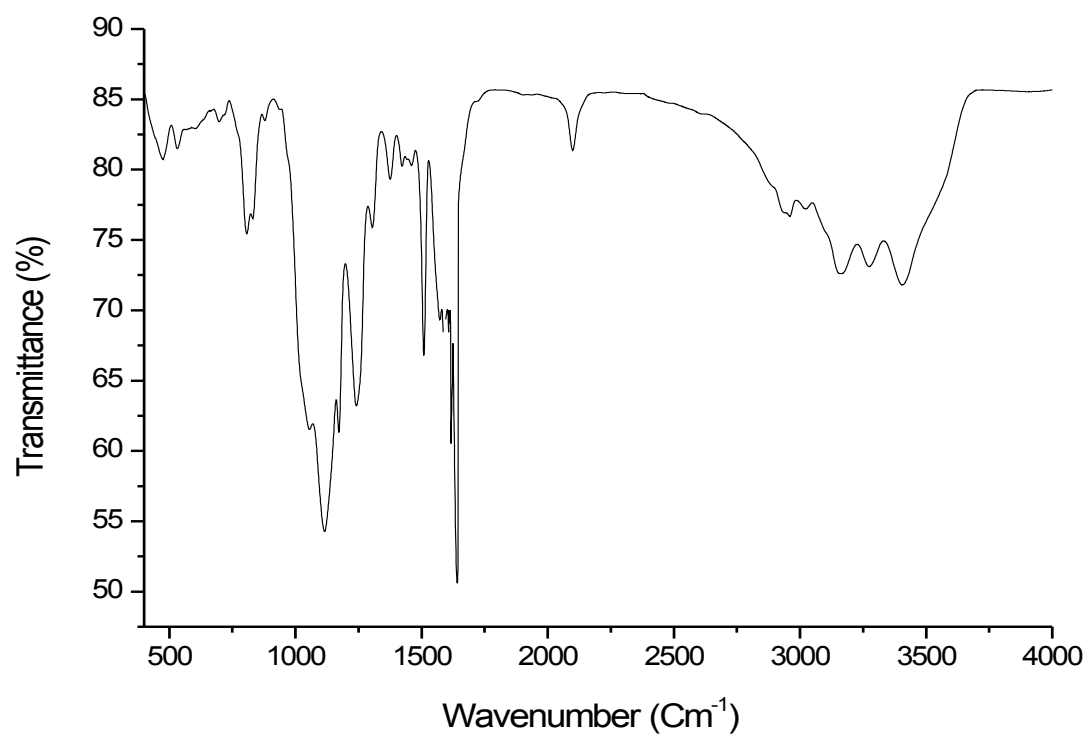

**Fig. S1.** IR spectra of compound 4.

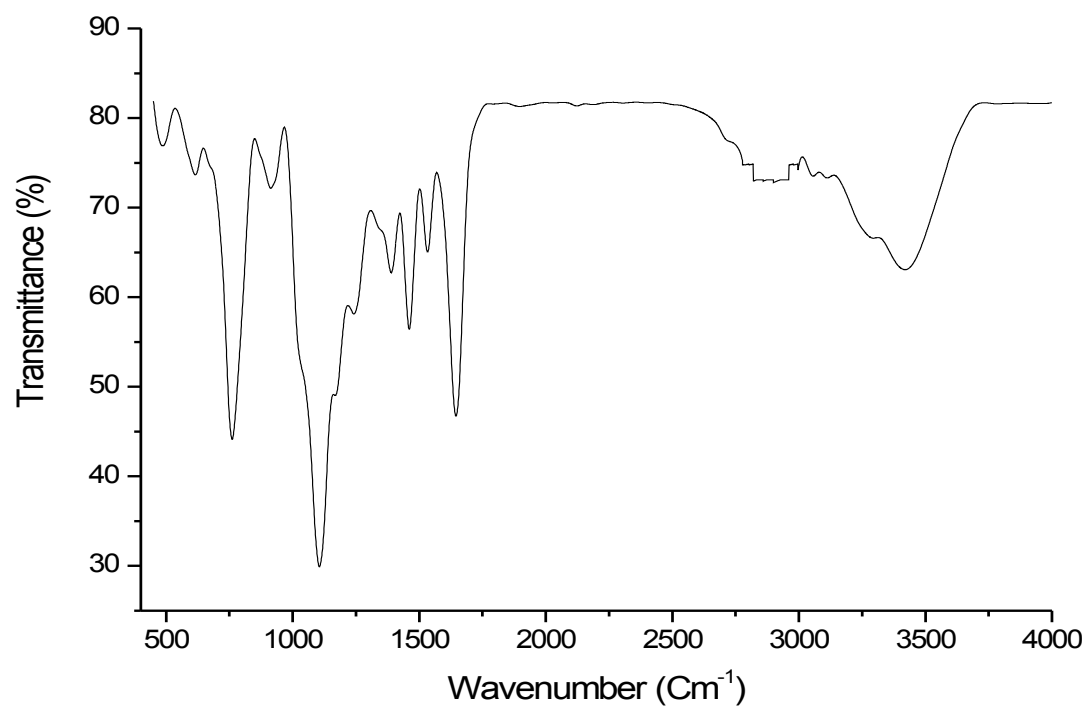

**Fig. S2.** IR spectra of compound 5.

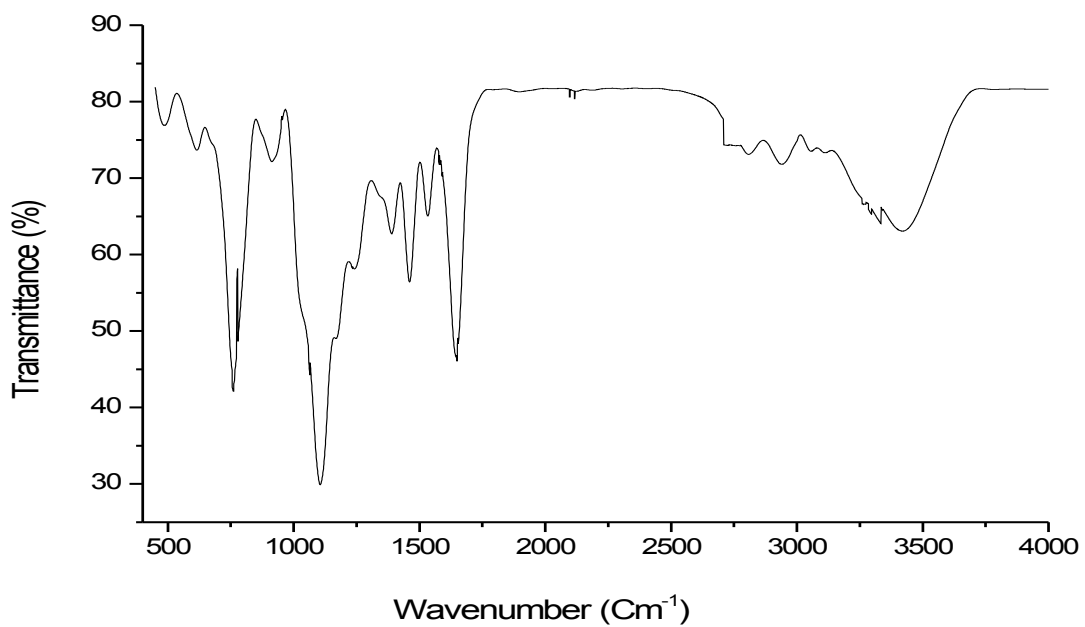

**Fig. S3.** IR spectra of compound 6.

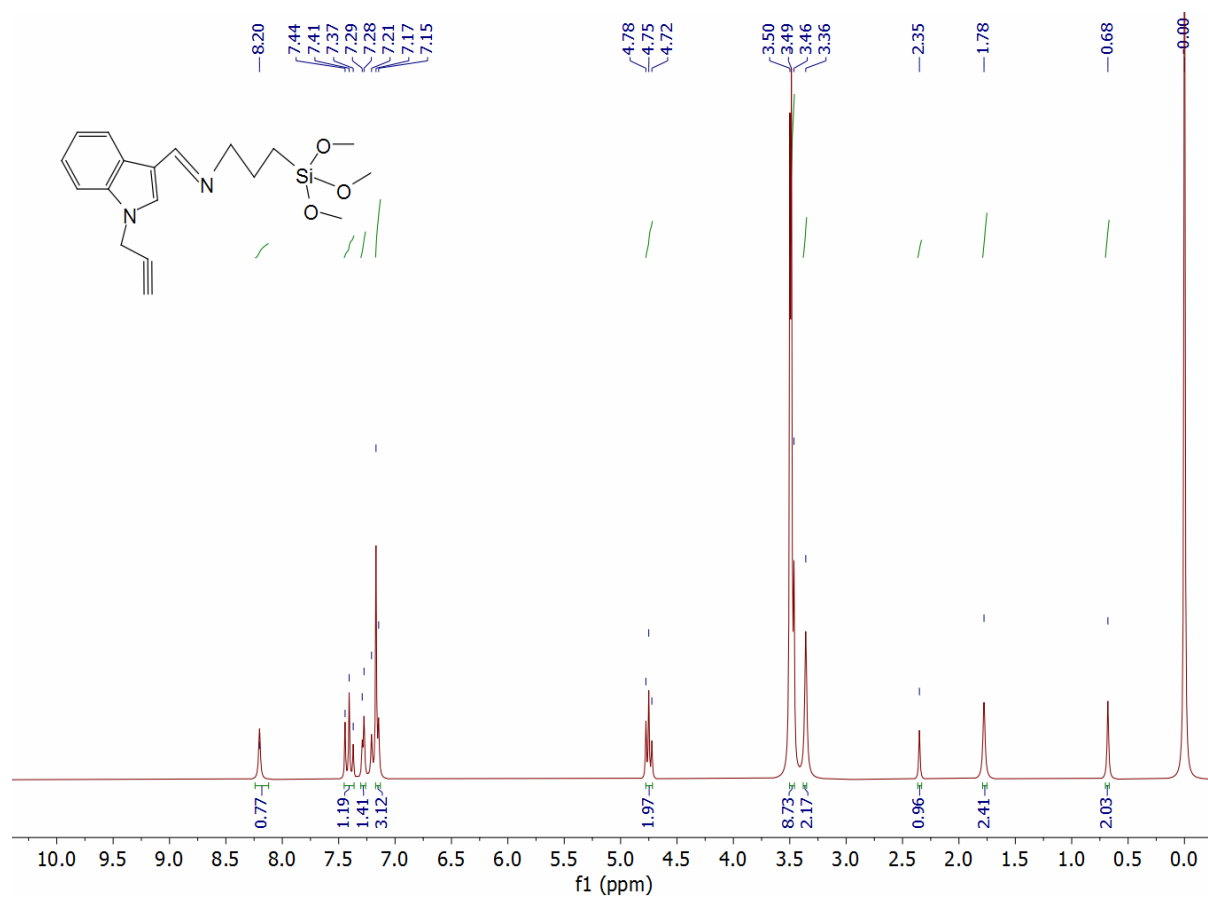

**Fig. S4.** <sup>1</sup>H NMR spectra of compound 4.

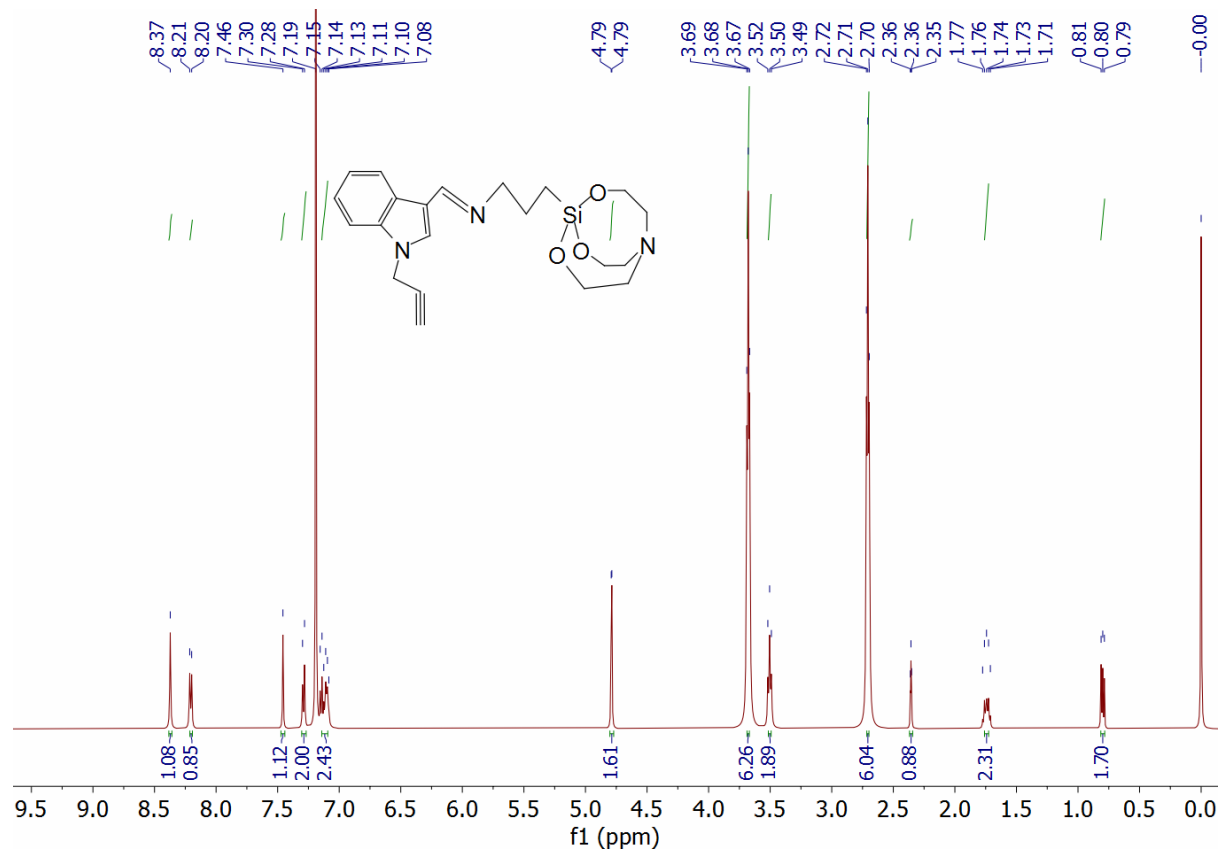

**Fig. S5.**  $^1\text{H}$  NMR spectra of compound 5.

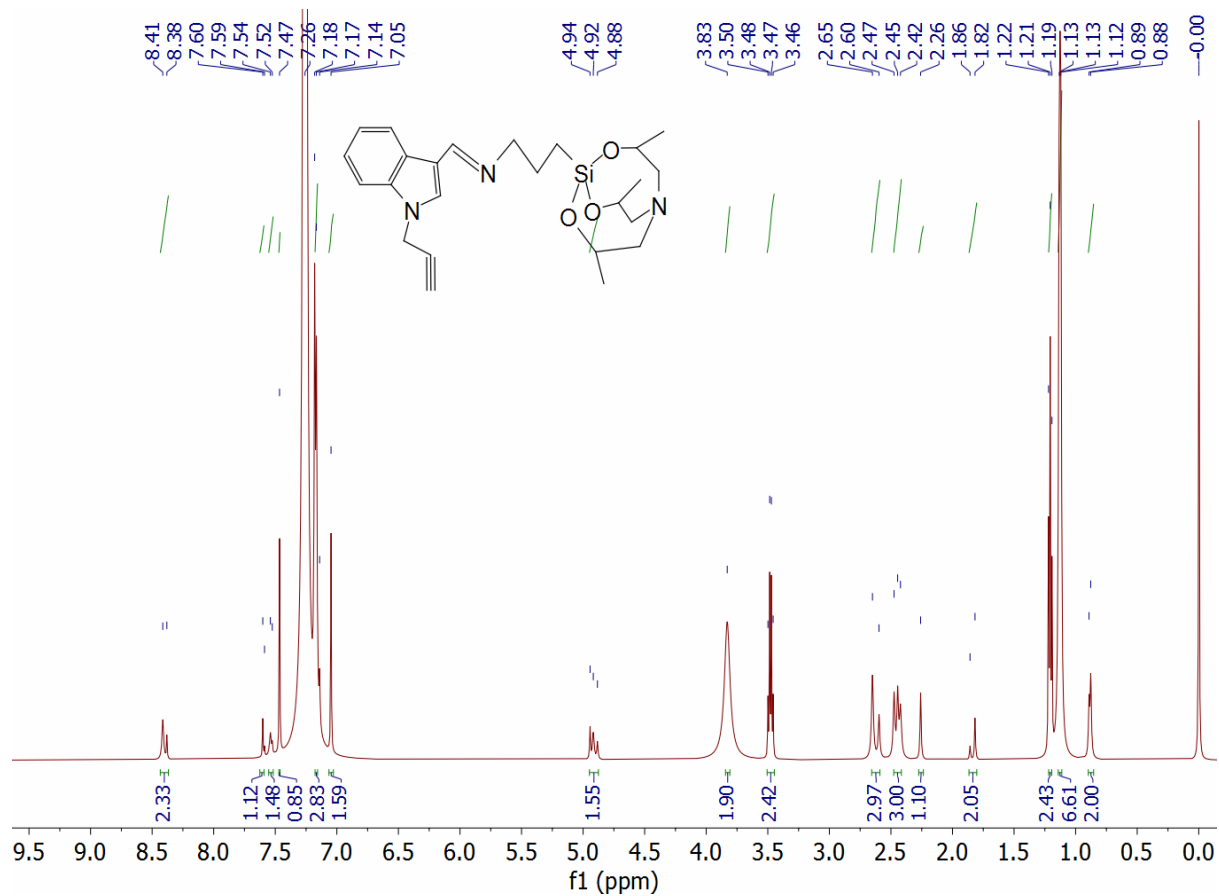

**Fig. S6.**  $^1\text{H}$  NMR spectra of compound 6.

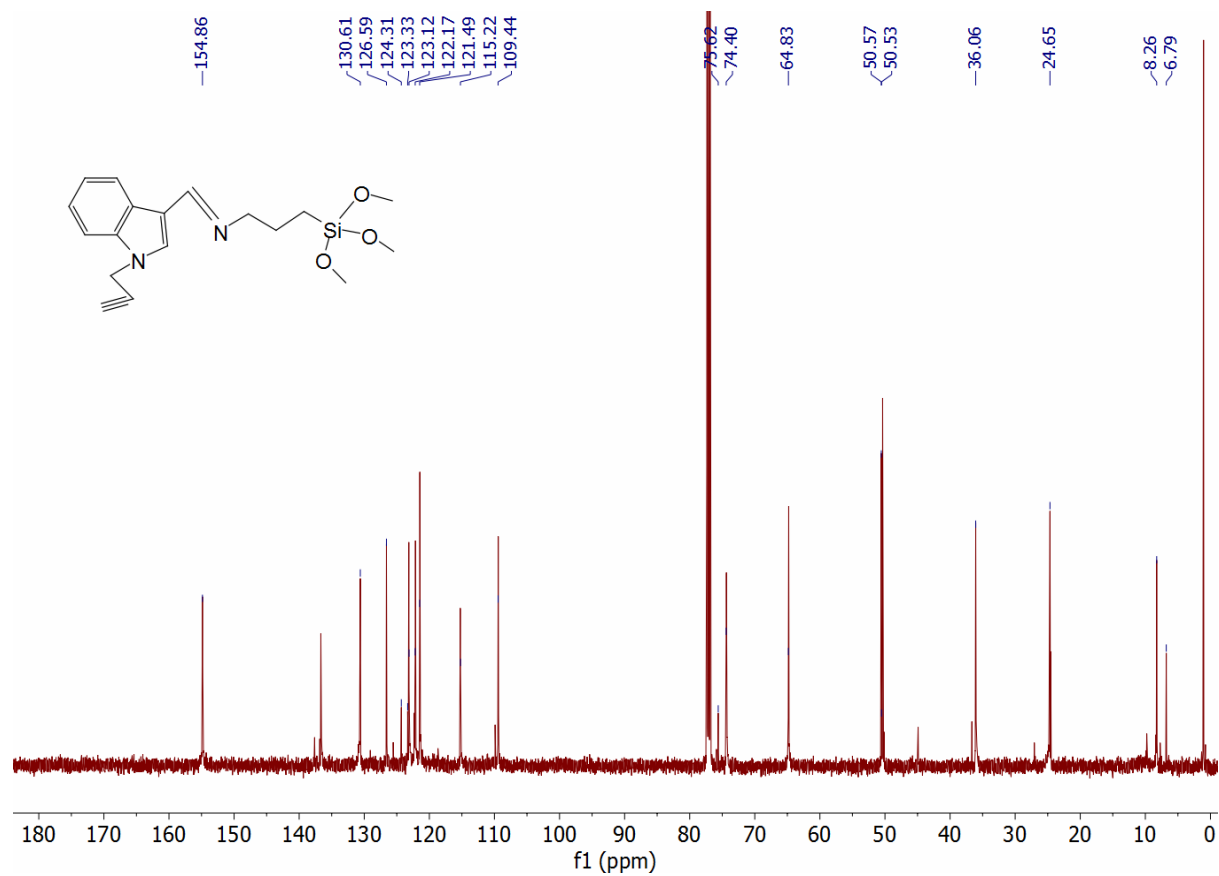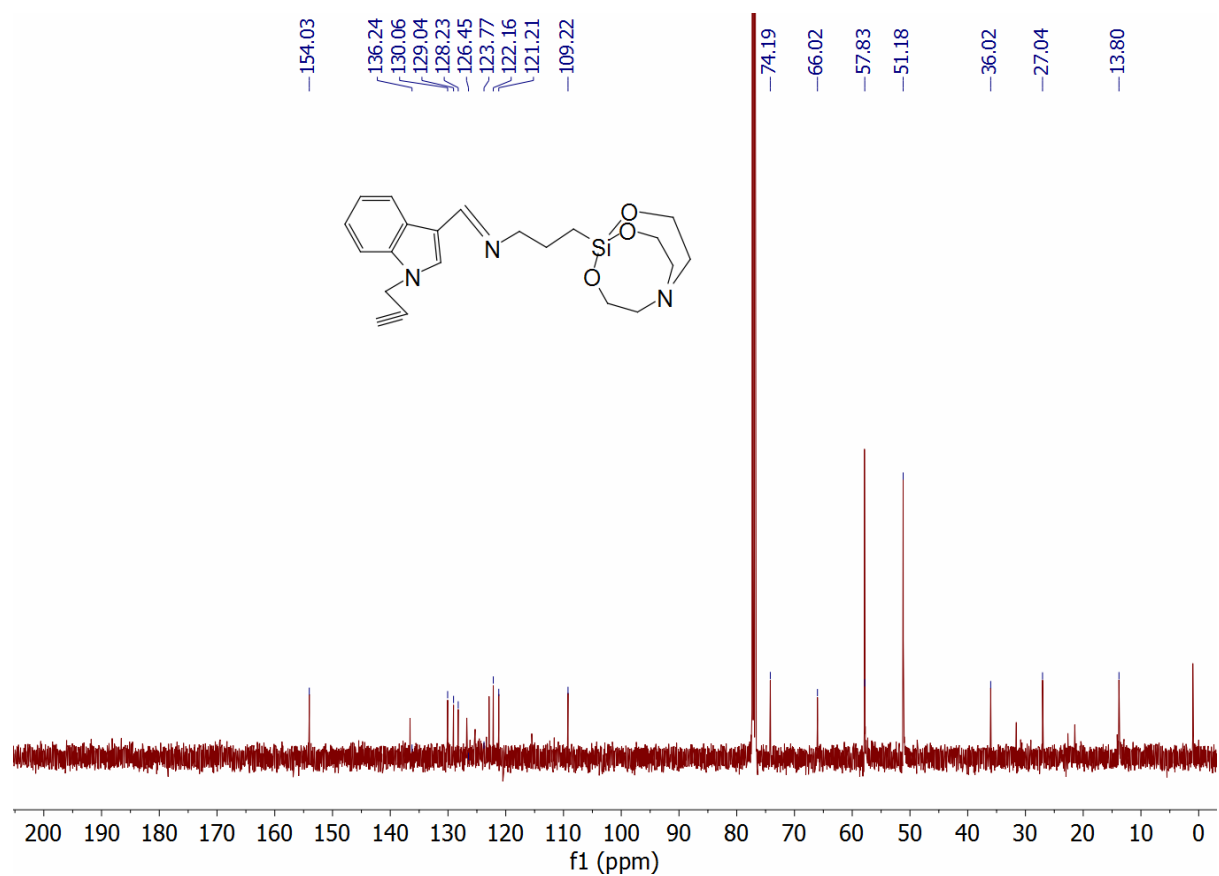

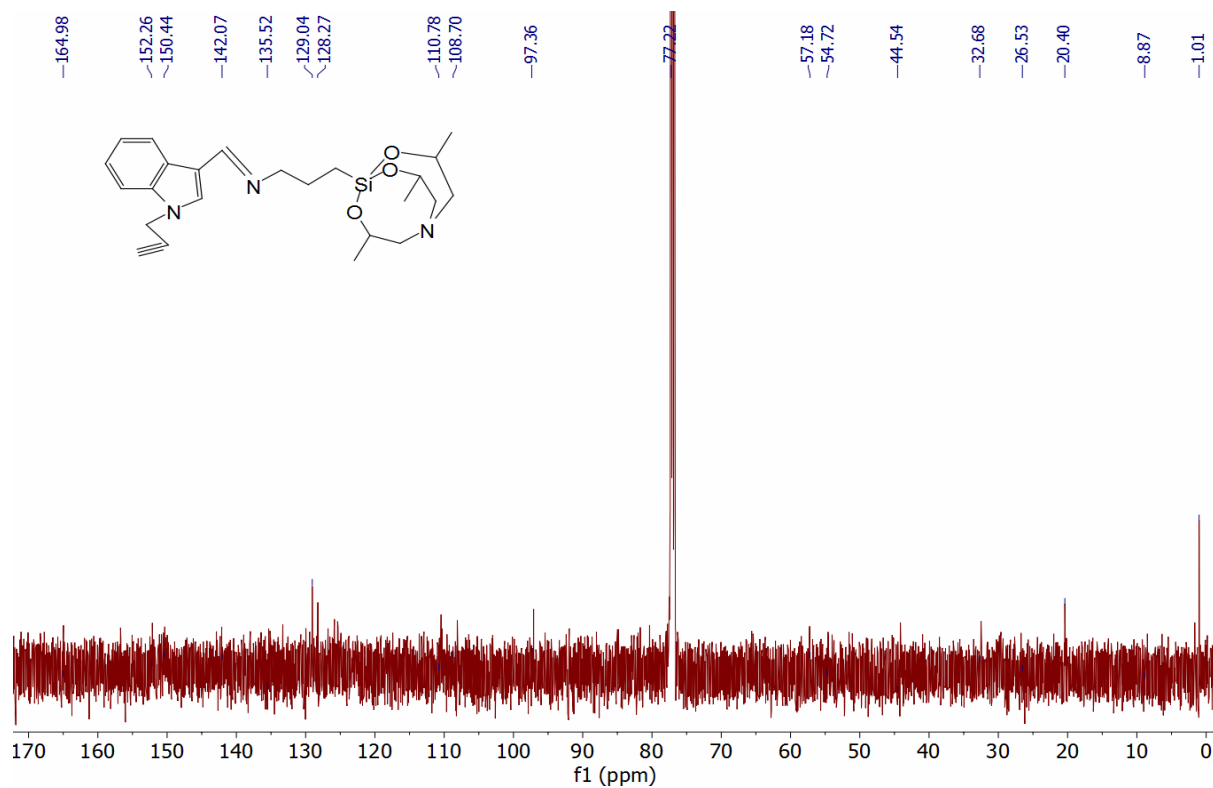

Fig. S9. <sup>13</sup>C NMR spectra of compound 6.

SAIF, PANJAB UNIVERSITY, CHANDIGARH

SUSHMA INNH2SIL 8 (0.171) Cm (8)

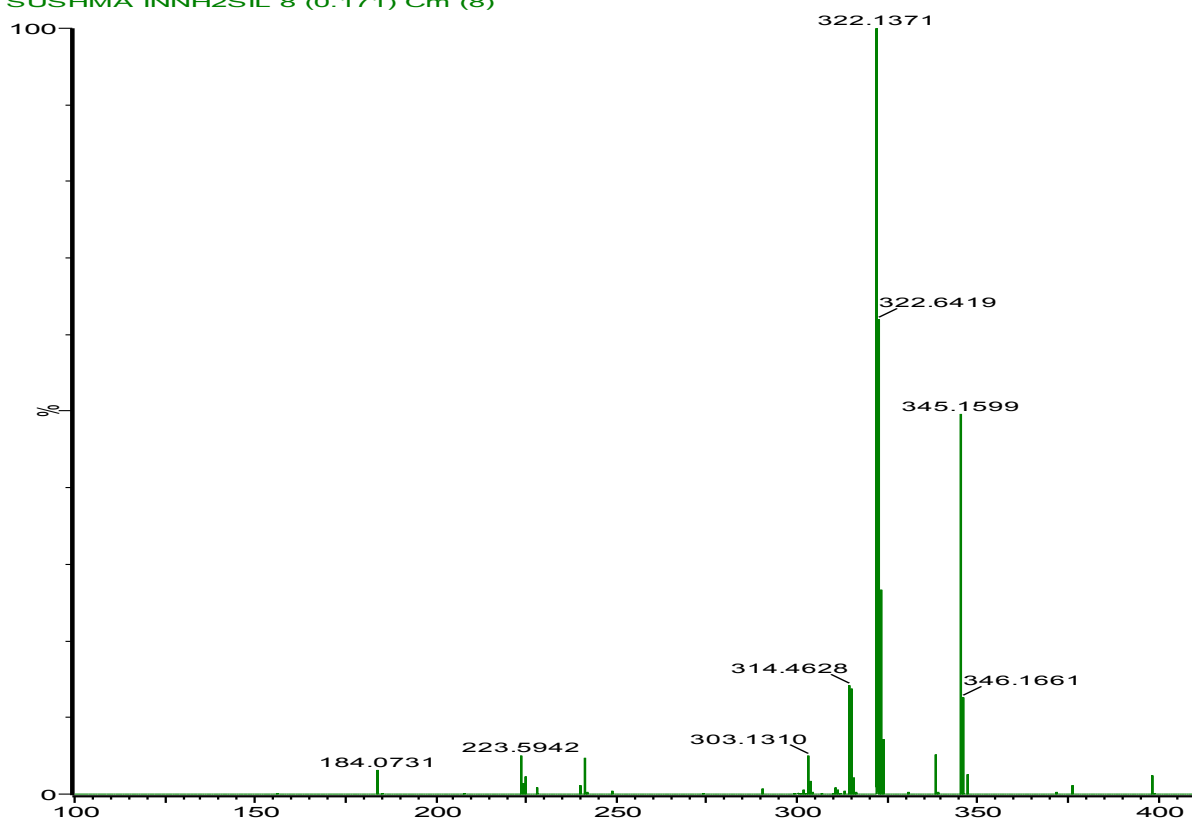

Fig. S10. HRMS of compound 4.

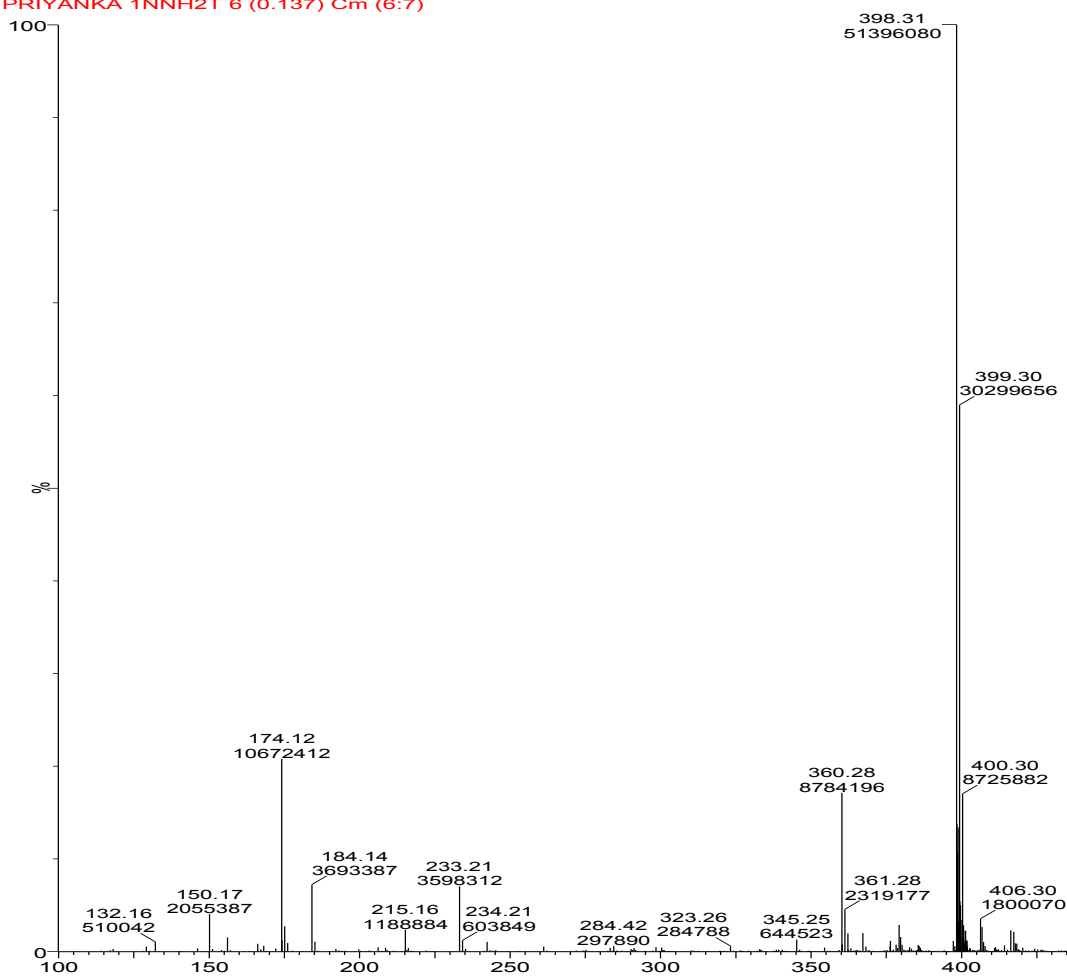

Fig. S11. Mass spectra of compound 5.

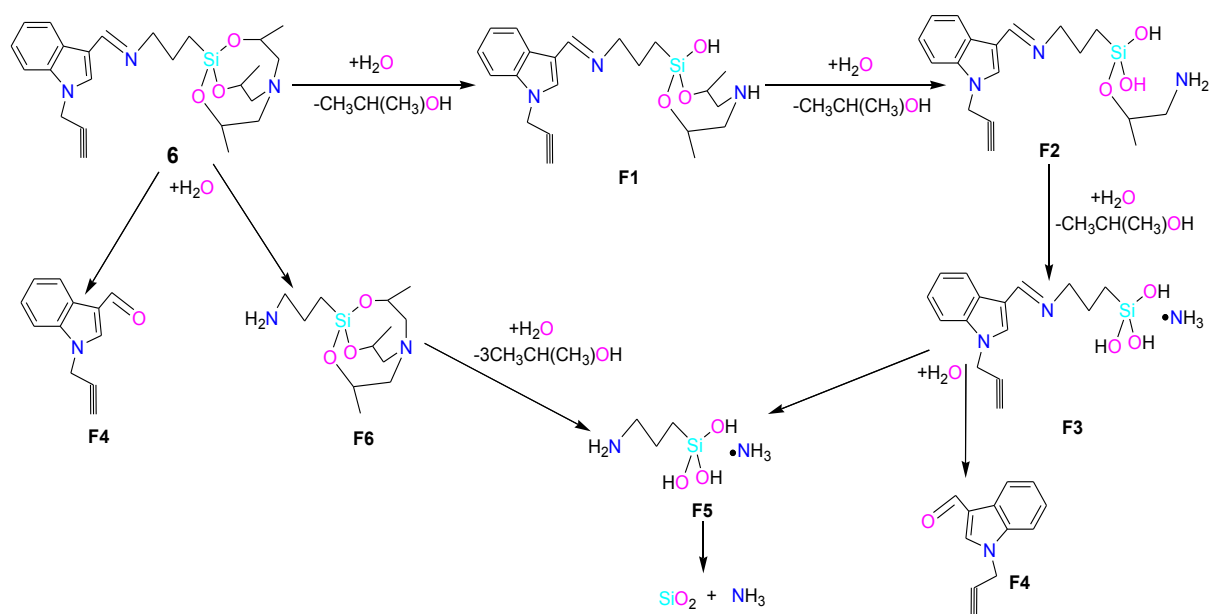

Scheme S1. Mass fragmentation pattern for synthesized silatrane 6.



SUSHMA INTIPA 8 (0.171) Cm (7:8)

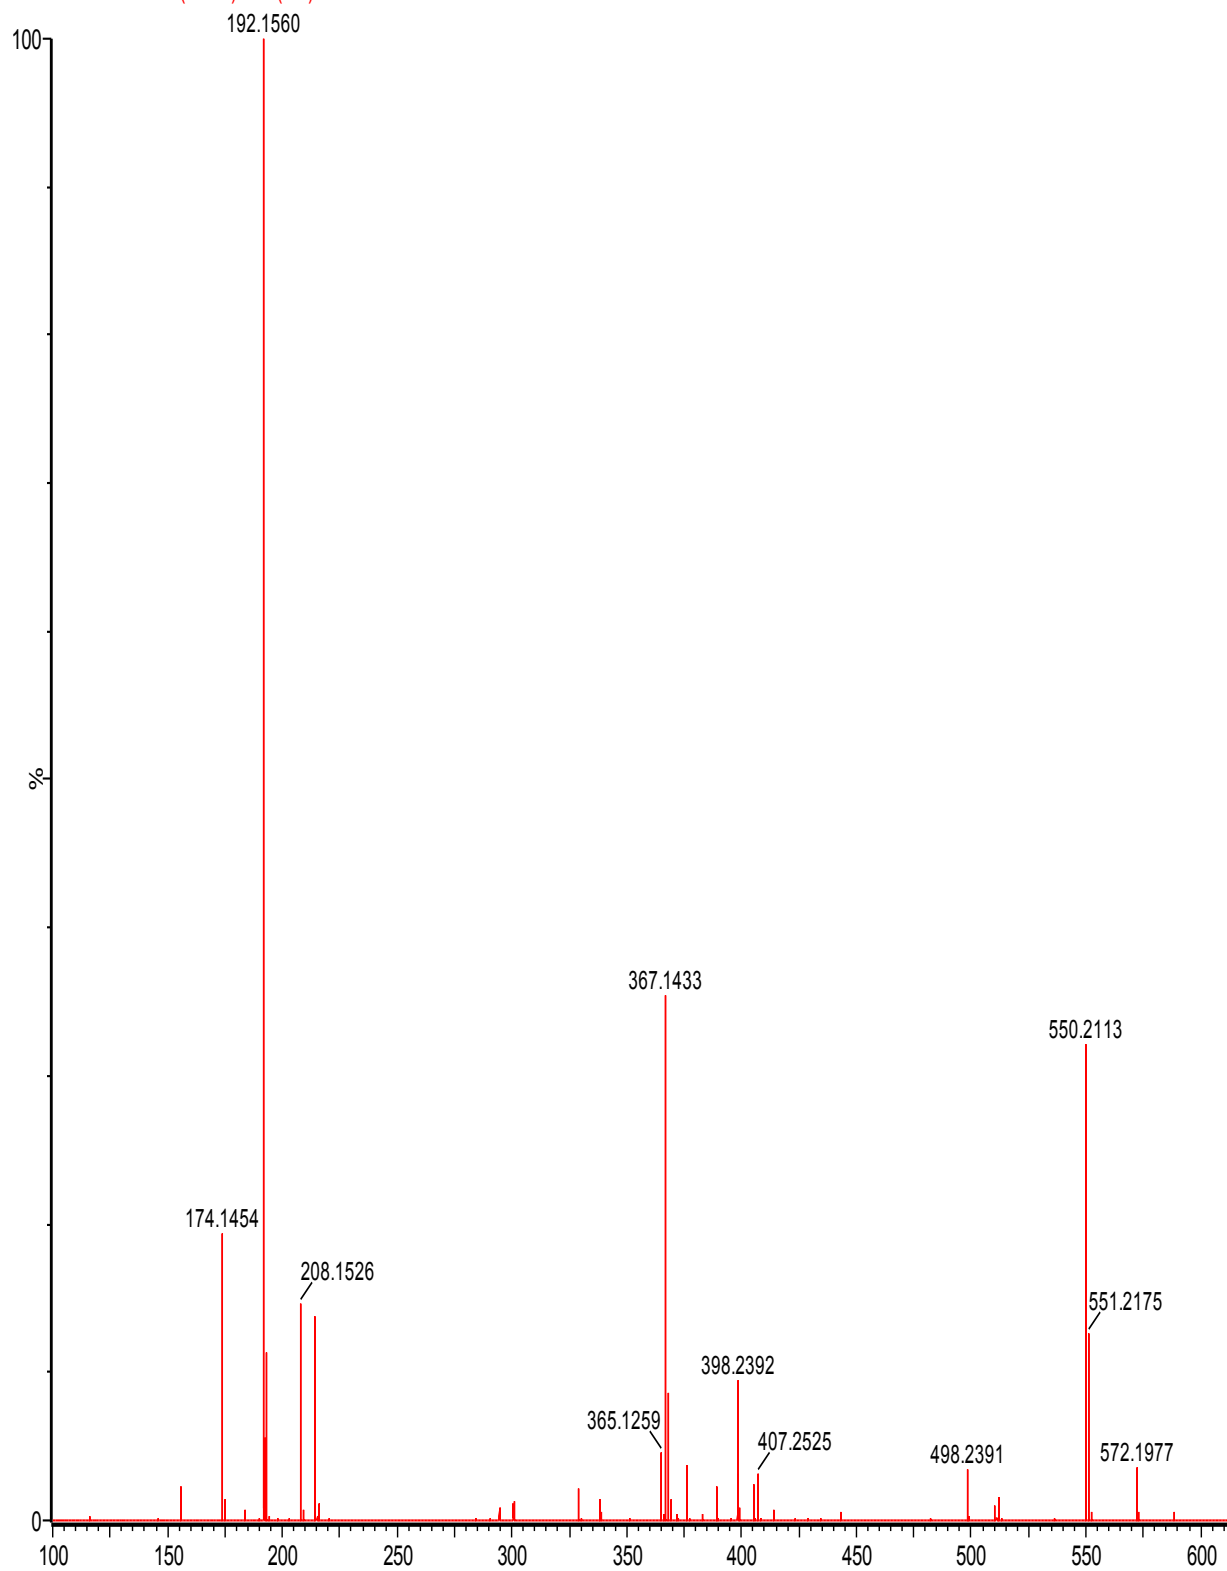**Fig. S12.** HRMS of compound **6**.

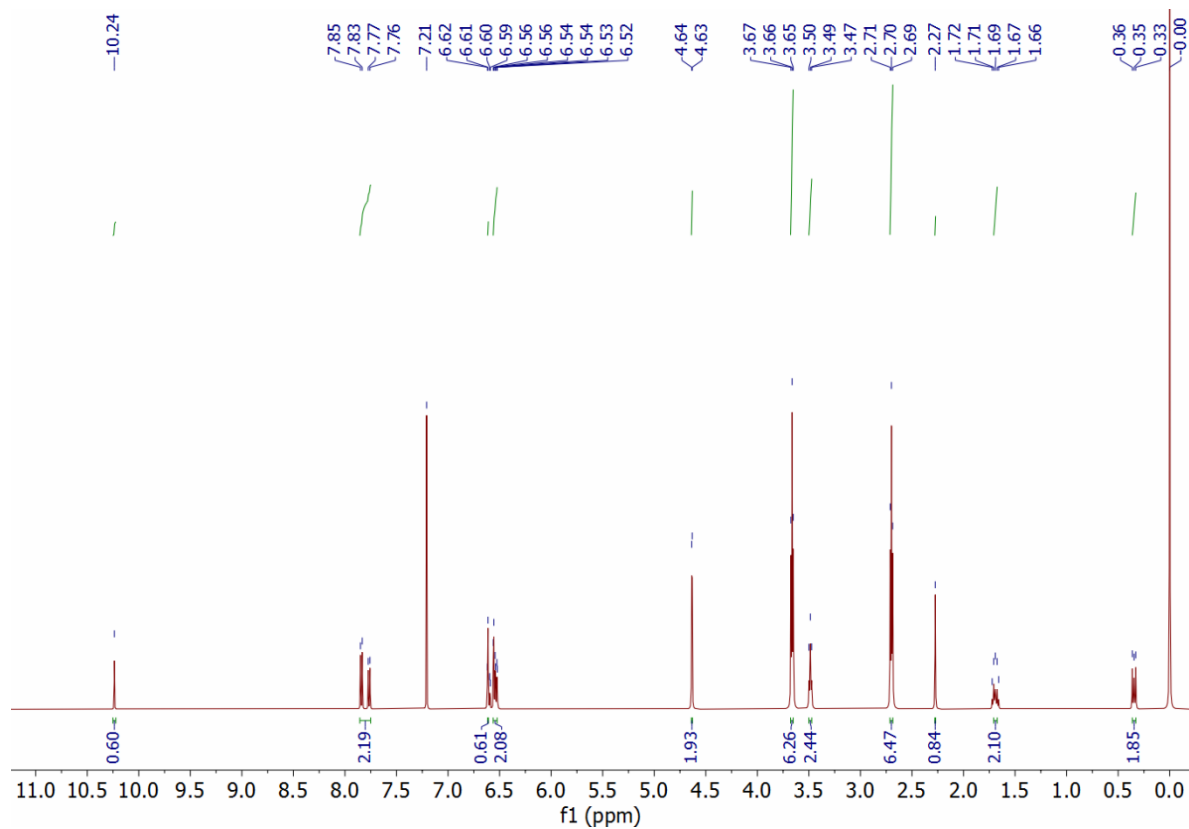

**Fig. S13.**  $^1\text{H}$  NMR spectra of **5**- $\text{Co}^{2+}$  complex.

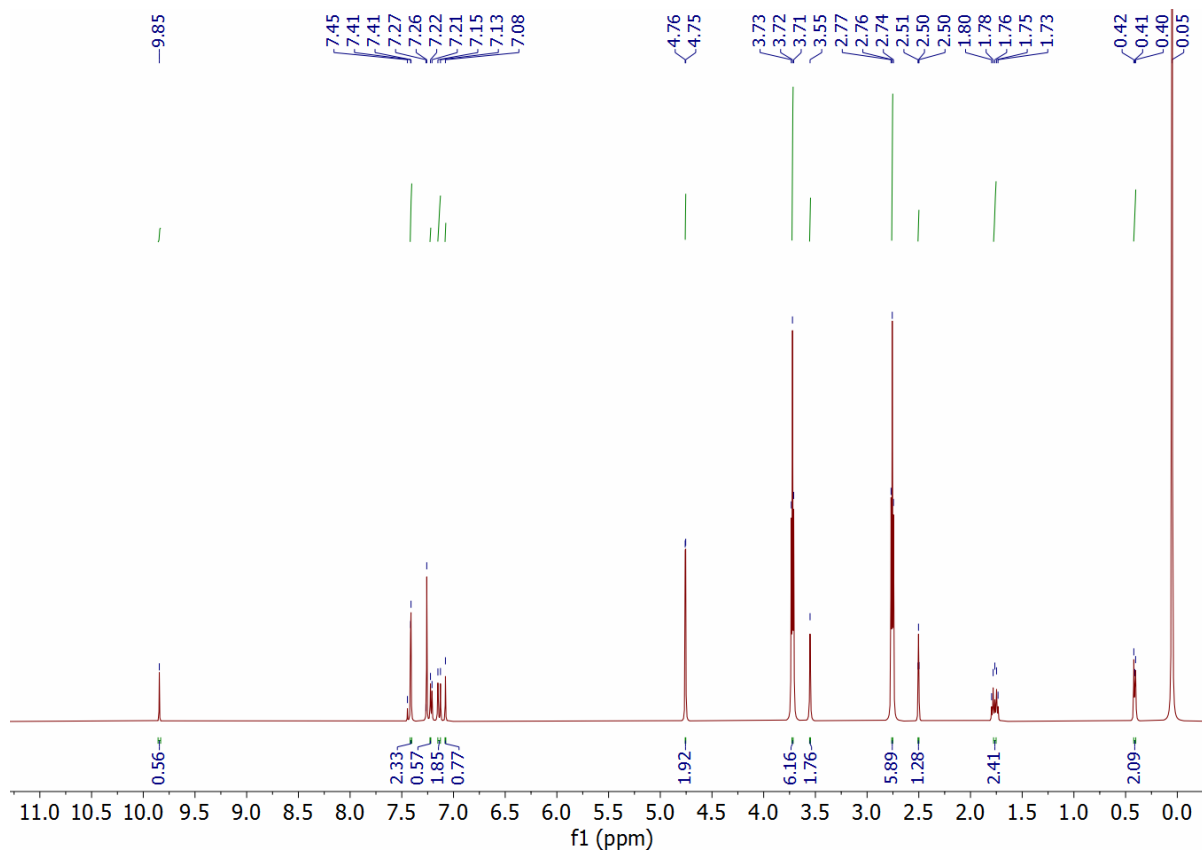

**Fig. S14.**  $^1\text{H}$  NMR spectra of **5**- $\text{Cu}^{2+}$  complex.

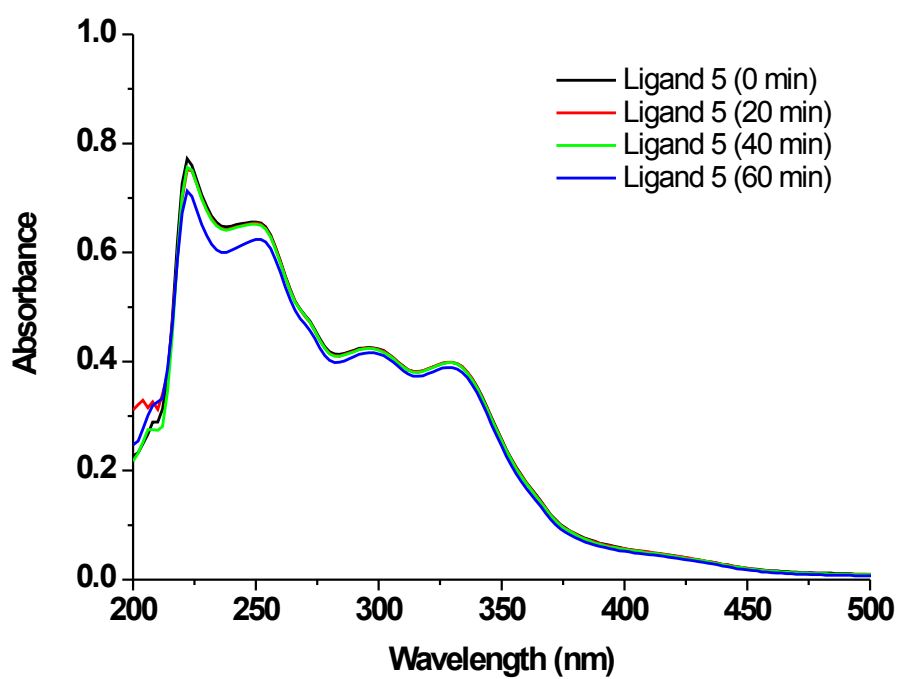

**Fig.**

**S15.** Time dependant UV-vis profile of ligand 5 in acetonitrile solution.

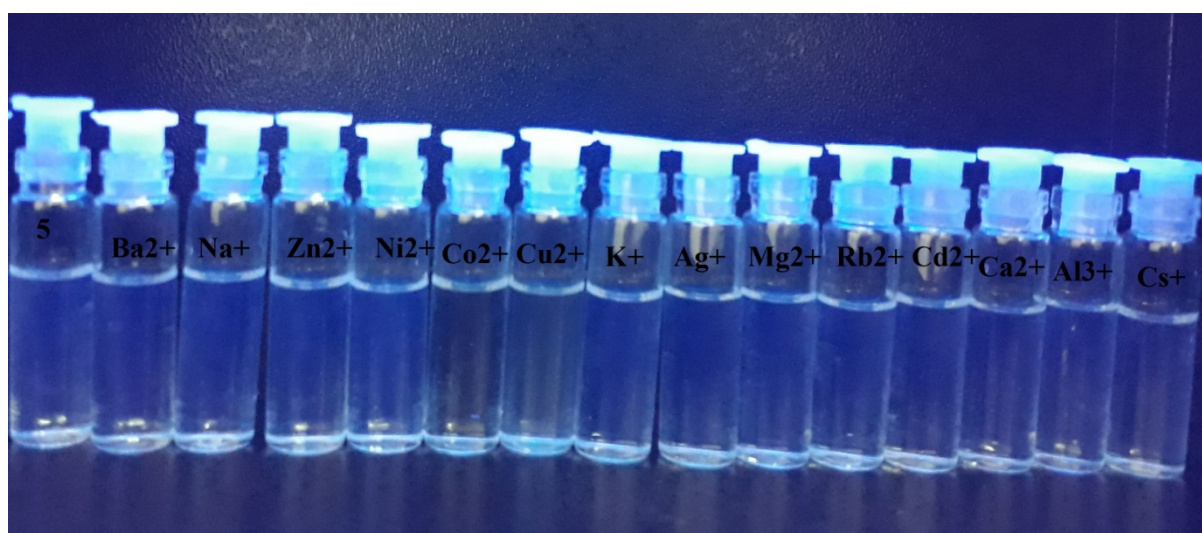

**Fig. S16.** Picture of ligand 5 in the presence of different metal ions under the UV-vis light.

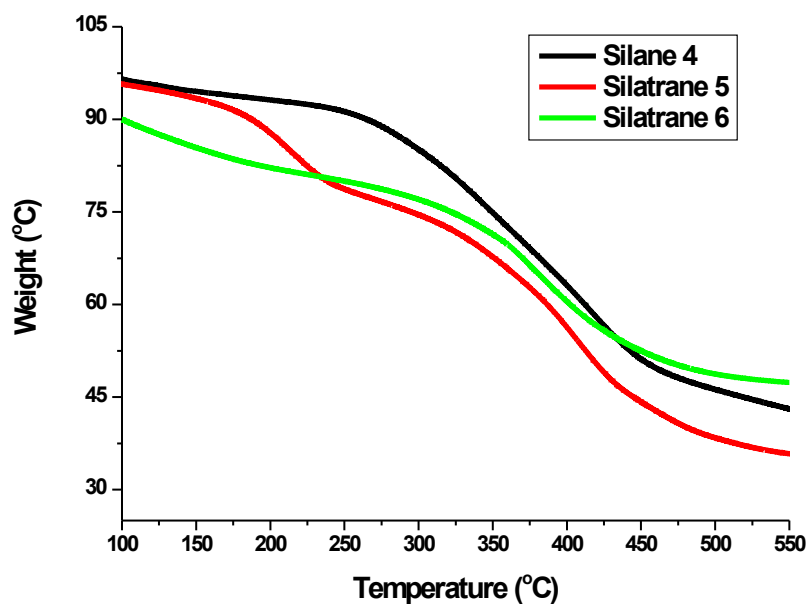

Fig. S17. Thermogravimetric curves of compounds (4-6).
